# Supplementary material for: Non-Invasive Quantification of Faecal and Urine Reproductive Hormone Metabolites in the Naked Mole-Rat (Heterocephalus glaber)
Source: MDPI journal article supplement (doi:10.3390/ani13193039), 2023-09-27
Supplement: s1 [file s1]

# Supplementary Materials

Table S1. Details on EIA antibodies, label, standard, and references for each EIA used in the study.

| <u>Name</u>                                                |          | <u>Antibody raised against</u>                      | <u>Label</u>                                                         | <u>Standard</u>                                              | <u>EIA described in</u> |
|------------------------------------------------------------|----------|-----------------------------------------------------|----------------------------------------------------------------------|--------------------------------------------------------------|-------------------------|
| <b>5<math>\alpha</math>-Progesterone</b><br><i>IZW</i> )   | (P9-     | 5 $\alpha$ -pregnane-3 $\beta$ -ol-20-one-3-HS-BSA  | 5 $\alpha$ -pregnane-3 $\alpha$ -ol-20-one -3-HS-HRP                 | 5 $\alpha$ -pregnane-3 $\alpha$ -ol-20-one                   | [32]                    |
| <b>Progesterone</b><br><i>5<math>\beta</math>-20-one</i> ) | (P4-Ak6, | 5 $\alpha$ -pregnane-3 $\alpha$ -ol-20-one-3HS:BSA  | 5 $\alpha$ -pregnane-3 $\alpha$ -ol-20-one-3HS:DADOO-biotin          | Progesterone                                                 | [33]                    |
| <b>Testosterone</b><br><i>CMO</i> )                        | (T-3-    | Testosterone-3-CMO:BSA                              | 5 $\alpha$ -androstane-3 $\beta$ ,17 $\beta$ -diol-3-HS:DADOO-biotin | Testosterone<br>(17 $\beta$ -Hydroxy-3-oxo-4-androstene)     | [34]                    |
| <b>Epiandrosterone</b>                                     |          | 5 $\alpha$ -androstane-3 $\alpha$ -ol-17-one-HS:BSA | 5 $\alpha$ -androstane-3,17-dione-thioether: DADOO-biotin            | Epiandrosterone (5 $\alpha$ -androstan-3 $\beta$ -ol-17-one) | [34]                    |

DADOO-biotin = N-biotinyl-1,8-diamino-3,6-dioxaoctane; HS = hemisuccinate; HRP = horseradish peroxidase; CMO = carboxymethyloxime; BSA = bovine serum albumin

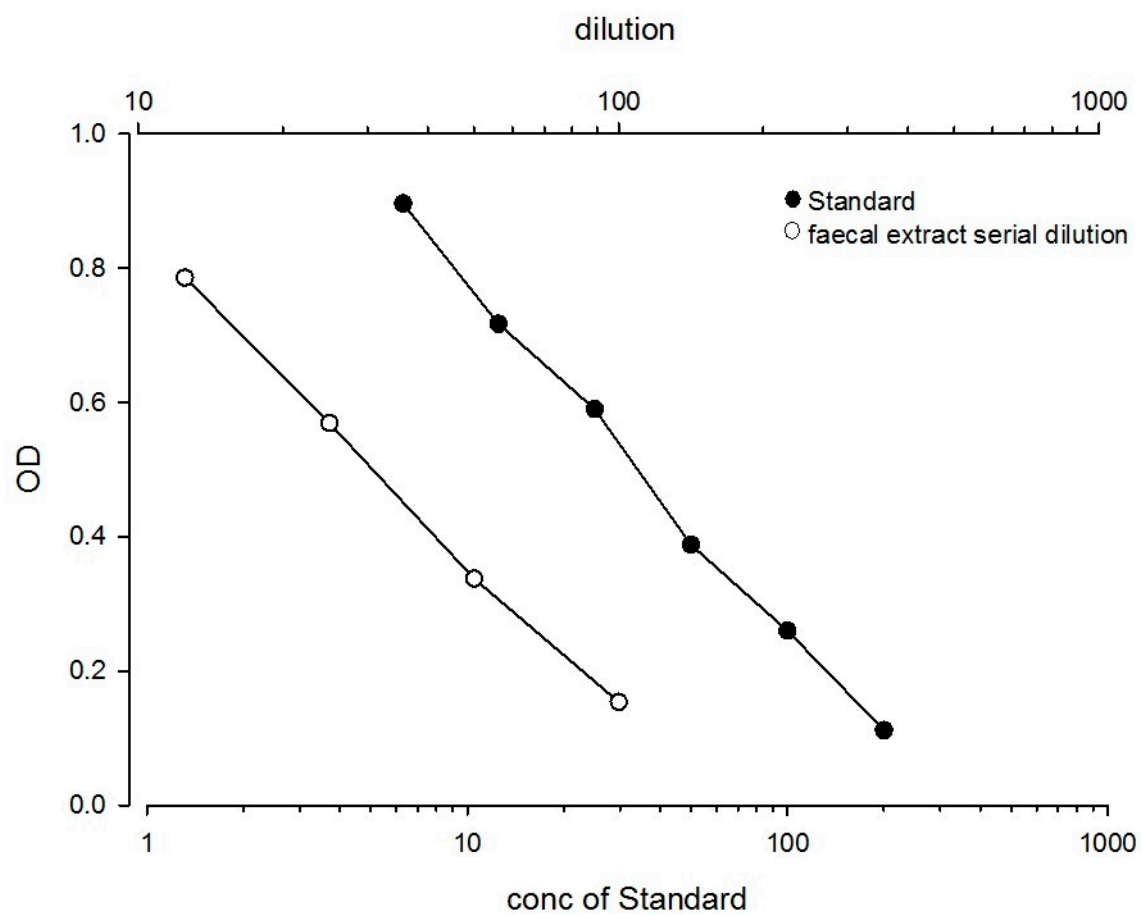

**Figure S1.** Serial dilutions of faecal extracts for the 5 $\alpha$ -Progesterone EIA.

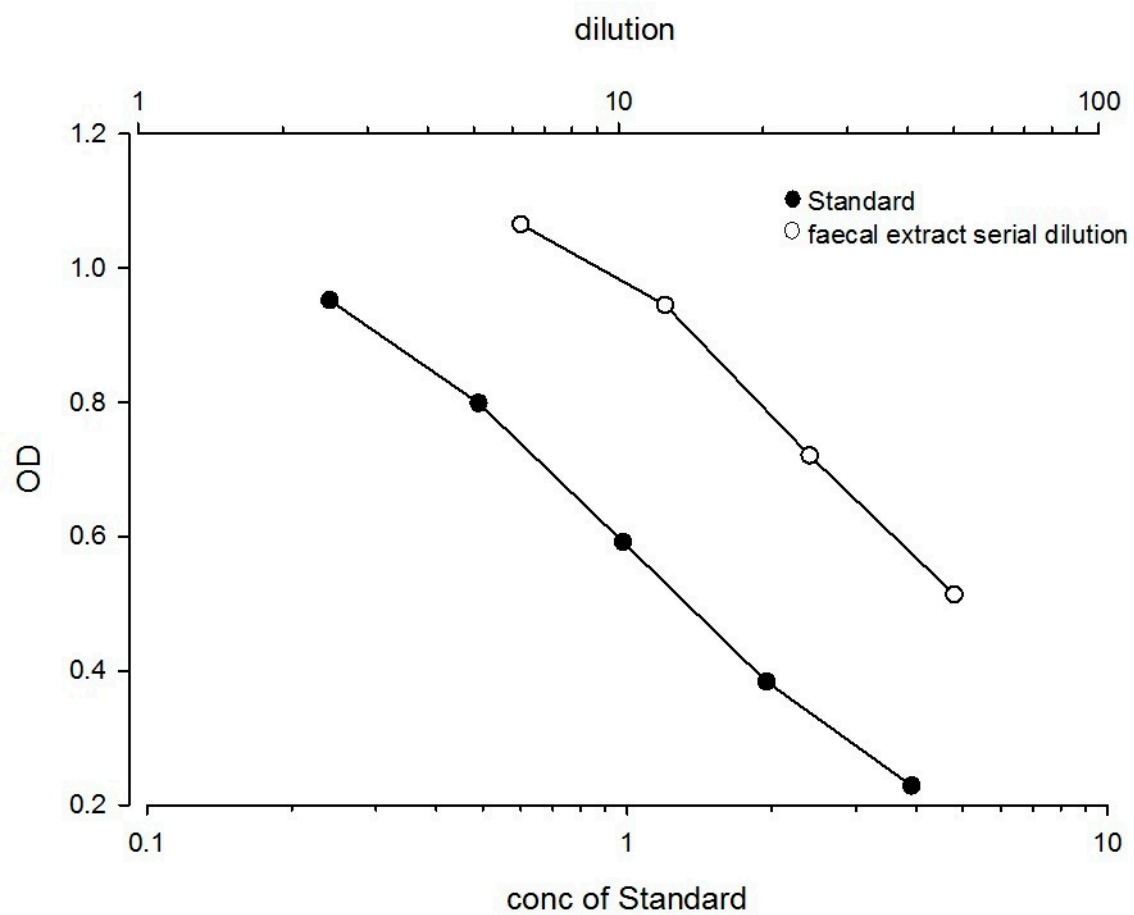

**Figure S2.** Serial dilutions of faecal extracts for the Epiandrosterone EIA.
